# Supplementary material for: Long-term use of interferon-β in multiple sclerosis increases Vδ1−Vδ2−Vγ9− γδ T cells that are associated with a better outcome
Source: PubMed Central journal article supplement (PMC6743159; doi:10.1186/s12974-019-1574-5), 2019-09-13
Supplement: 12974_2019_1574_MOESM1_ESM.pdf [file 12974_2019_1574_MOESM1_ESM.pdf]

**Table S1** Clinical demographics of IFN- $\beta$ -treated MS patients in the NEDA and EDA groups

|                                                    | MS w/IFN- $\beta$        |                          |                         | <i>p</i> value     |                   |                    |
|----------------------------------------------------|--------------------------|--------------------------|-------------------------|--------------------|-------------------|--------------------|
|                                                    | NEDA<br>( <i>n</i> = 8)  | EDA<br>( <i>n</i> = 13)  | HCs<br>( <i>n</i> = 44) | NEDA<br>vs.<br>HCs | EDA<br>vs.<br>HCs | NEDA<br>vs.<br>EDA |
| Female, <i>n</i> (%)                               | 6 (75.0)                 | 9 (69.2)                 | 27 (61.4)               | NS                 | NS                | NS                 |
| Age at examination, years                          | 47.0 [44.5-53.8]         | 44.0 [41.0-46.5]         | 35.0 [32.3-43.8]        | 0.004              | 0.010             | NS                 |
| Age at disease onset, years                        | 30.5 [25.5-34.8]         | 27.0 [23.5-34.0]         | –                       | –                  | –                 | NS                 |
| Disease duration at INF- $\beta$ initiation, years | 6.83 [1.38-10.3]         | 6.50 [2.29-12.9]         | –                       | –                  | –                 | NS                 |
| Disease duration at examination, years             | 15.8 [9.00-23.9]         | 15.2 [10.7-20.6]         | –                       | –                  | –                 | NS                 |
| Subtype (RRMS / SPMS / PPMS), <i>n</i> (%)         | 7/1/0<br>(87.5/12.5/0.0) | 6/6/1<br>(46.2/46.2/7.7) | –                       | –                  | –                 | NS                 |
| EDSS score at IFN- $\beta$ initiation              | 3.0 [1.25-6.13]          | 2.5 [1.75-5.25]          | –                       | –                  | –                 | NS                 |
| EDSS score at examination                          | 2.0 [1.13-2.75]          | 4.5 [2.0-6.25]           | –                       | –                  | –                 | NS (0.062)         |
| $\Delta$ EDSS                                      | –0.5 [–1.5-0.0]          | 1.0 [0.25-2.5]           | –                       | –                  | –                 | 0.003              |
| MSSS at IFN- $\beta$ initiation                    | 4.89 [2.86-8.38]         | 6.00 [2.15-7.19]         | –                       | –                  | –                 | NS                 |
| MSSS at examination                                | 1.84 [0.57-3.65]         | 3.52 [1.99-7.39]         | –                       | –                  | –                 | NS (0.060)         |
| $\Delta$ MSSS                                      | –2.69 [–5.16–1.16]       | –0.20 [–1.69-0.96]       | –                       | –                  | –                 | 0.013              |
| Years of IFN- $\beta$ treatment                    | 9.50 [5.50-14.5]         | 7.00 [4.50-8.50]         | –                       | –                  | –                 | NS                 |

Values are the median [IQR] or count (%).  $\Delta$ EDSS was calculated as the difference between EDSS scores at IFN- $\beta$  initiation and at examination.  $\Delta$ MSSS was the difference between MSSS at IFN- $\beta$  initiation and at examination.

EDA = evidence of disease activity; EDSS = Expanded Disability Status Scale; HCs = healthy controls; IFN- $\beta$  = interferon- $\beta$ ; IQR = interquartile ranges; MS = multiple sclerosis; MSSS = multiple sclerosis severity score; NEDA = no-evidence of disease activity; NS = not significant; PPMS = primary progressive MS; RRMS = relapsing-remitting MS; SPMS = secondary progressive MS; w/ = with.

**Table S2** Clinical demographics of untreated MS patients in the NEDA and EDA groups

|                                           | Untreated MS               |                           |                         | <i>p</i> value     |                   |                    |
|-------------------------------------------|----------------------------|---------------------------|-------------------------|--------------------|-------------------|--------------------|
|                                           | NEDA<br>( <i>n</i> = 19)   | EDA<br>( <i>n</i> = 13)   | HCs<br>( <i>n</i> = 44) | NEDA<br>vs.<br>HCs | EDA<br>vs.<br>HCs | NEDA<br>vs.<br>EDA |
| Female, <i>n</i> (%)                      | 16 (84.2)                  | 12 (92.3)                 | 27 (61.4)               | NS (0.086)         | 0.044             | NS                 |
| Age at examination, years                 | 52.0 [38.0-62.0]           | 49.0 [35.5-55.5]          | 35.0 [32.3-43.8]        | <0.001             | NS (0.054)        | NS                 |
| Age at disease onset, years               | 31.0 [24.0-44.0]           | 31.0 [24.5-36.5]          | –                       | –                  | –                 | NS                 |
| Disease duration at examination, years    | 13.9 [8.2-26.9]            | 13.0 [4.6-21.0]           | –                       | –                  | –                 | NS                 |
| Subtype (RRMS/SPMS/PPMS), <i>n</i> (%)    | 14/3/2<br>(73.7/15.8/10.5) | 10/2/1<br>(76.9/15.4/7.7) | –                       | –                  | –                 | NS                 |
| EDSS score at 2 years before examination* | 2.0 [0.0-4.0]              | 1.0 [0.0-5.4]             | –                       | –                  | –                 | NS                 |
| EDSS score at examination                 | 2.0 [0.0-4.0]              | 2.0 [1.0-5.5]             | –                       | –                  | –                 | NS                 |
| $\Delta$ EDSS*                            | 0.0 [0.0-0.0]              | 1.00 [1.0-2.5]            | –                       | –                  | –                 | <0.001             |
| MSSS at 2 years before examination*       | 2.13 [0.25-5.44]           | 1.27 [0.06-6.16]          | –                       | –                  | –                 | NS                 |
| MSSS at examination                       | 1.80 [0.21-5.16]           | 2.85 [0.88-8.89]          | –                       | –                  | –                 | NS                 |
| $\Delta$ MSSS*                            | -0.09 [-0.62--0.03]        | 1.18 [0.33-1.44]          | –                       | –                  | –                 | <0.001             |

Values are the median [IQR] or count (%).  $\Delta$ EDSS was calculated as the difference between EDSS scores at 2 years before examination and at examination.

$\Delta$ MSSS was the difference between MSSS at 2 years before examination and at examination.

\*The data of 5 patients are missing because of a lack of data before the onset.

EDA = evidence of disease activity; EDSS = Expanded Disability Status Scale; HCs = healthy controls; IFN- $\beta$  = interferon- $\beta$ ; IQR = interquartile ranges; MS = multiple sclerosis; MSSS = multiple sclerosis severity score; NEDA = no-evidence of disease activity; NS = not significant; PPMS = primary progressive MS; RRMS = relapsing-remitting MS; SPMS = secondary progressive MS.

**Table S3** Comparison of clinical demographics between RRMS and PMS patients

|                                                    | Untreated MS             |                        |                | MS w/IFN- $\beta$        |                        |                |
|----------------------------------------------------|--------------------------|------------------------|----------------|--------------------------|------------------------|----------------|
|                                                    | RRMS<br>( <i>n</i> = 26) | PMS<br>( <i>n</i> = 9) | <i>p</i> value | RRMS<br>( <i>n</i> = 13) | PMS<br>( <i>n</i> = 8) | <i>p</i> value |
| Female, <i>n</i> (%)                               | 23 (88.5)                | 7 (77.8)               | NS             | 9 (69.2)                 | 6 (75.0)               | NS             |
| Age at examination, years                          | 45.0 [36.5-54.0]         | 56.0 [46.5-67.5]       | 0.043          | 46.0 [43.0-47.0]         | 44.0 [40.8-51.5]       | NS             |
| Age at disease onset, years                        | 31.0 [27.8-36.0]         | 29.0 [19.0-55.0]       | NS             | 30.0 [25.0-34.0]         | 26.0 [21.0-36.8]       | NS             |
| Disease duration at examination, years             | 13.0 [7.6-18.3]          | 20.9 [10.7-28.1]       | NS (0.086)     | 15.4 [11.1-21.7]         | 15.2 [10.2-20.8]       | NS             |
| EDSS score at examination                          | 1.5 [0.0-3.0]            | 7.0 [6.25-7.25]        | <0.001         | 2.0 [1.5-2.5]            | 6.25 [5.63-6.88]       | <0.001         |
| MSSS at examination                                | 1.57 [0.24-2.99]         | 7.97 [6.56-8.60]       | <0.001         | 1.64 [0.61-2.88]         | 7.24 [6.78-7.60]       | <0.001         |
| Disease duration at IFN- $\beta$ initiation, years | –                        | –                      | –              | 7.1 [1.7-12.9]           | 5.8 [1.9-11.5]         | NS             |
| EDSS score at IFN- $\beta$ initiation              | –                        | –                      | –              | 2.0 [1.0-3.5]            | 4.0 [2.5-6.0]          | NS (0.074)     |
| MSSS at IFN- $\beta$ initiation                    | –                        | –                      | –              | 3.69 [1.32-5.62]         | 7.19 [6.04-7.74]       | 0.015          |
| Years of IFN- $\beta$ treatment                    | –                        | –                      | –              | 7.0 [4.0-9.5]            | 8.5 [6.3-13.8]         | NS             |

Values are the median [IQR] or count (%).

EDSS = Expanded Disability Status Scale; IFN- $\beta$  = interferon- $\beta$ ; IQR = interquartile ranges; MS = multiple sclerosis; MSSS = MS severity score; NS = not significant; PMS = progressive MS; RRMS = relapsing-remitting MS; w/ = with.

**Table S4** Comparison of the percentages of CD4<sup>+</sup> T cell subsets between the untreated MS group, IFN- $\beta$ -treated MS group and healthy controls

| In total CD4 <sup>+</sup> T cells                | Untreated MS<br>( <i>n</i> = 35) | MS w/ IFN- $\beta$<br>( <i>n</i> = 21) | HCs<br>( <i>n</i> = 44) | <i>p</i> value (K-<br>W test) | <i>p</i> <sup>adj</sup> value |                                  |                                           |
|--------------------------------------------------|----------------------------------|----------------------------------------|-------------------------|-------------------------------|-------------------------------|----------------------------------|-------------------------------------------|
|                                                  |                                  |                                        |                         |                               | Untreated MS<br>vs.<br>HCs    | MS w/ IFN- $\beta$<br>vs.<br>HCs | Untreated MS<br>vs.<br>MS w/ IFN- $\beta$ |
| Tnaive (CCR7 <sup>+</sup> CD45RA <sup>+</sup> )  | 45.3 [38.8-59.4]                 | 51.2 [41.2-58.8]                       | 49.4 [36.1-56.9]        | NS                            | –                             | –                                | –                                         |
| Tcm (CCR7 <sup>+</sup> CD45RA <sup>-</sup> )     | 27.9 [21.7-33.7]                 | 26.7 [21.0-32.0]                       | 25.7 [23.2-33.6]        | NS                            | –                             | –                                | –                                         |
| Tem (CCR7 <sup>-</sup> CD45RA <sup>-</sup> )     | 19.2 [12.5-24.7]                 | 16.4 [13.9-26.8]                       | 18.8 [15.3-28.8]        | NS                            | –                             | –                                | –                                         |
| Teff (CCR7 <sup>-</sup> CD45RA <sup>+</sup> )    | 2.82 [1.74-3.87]                 | 2.87 [2.20-4.58]                       | 2.51 [1.99-3.67]        | NS                            | –                             | –                                | –                                         |
| Activated T (HLA-DR <sup>+</sup> )               | 1.96 [1.50-3.07]                 | 2.36 [1.72-3.02]                       | 2.81 [1.59-3.57]        | NS                            | –                             | –                                | –                                         |
| Treg (CD25 <sup>+</sup> CD127 <sup>low/-</sup> ) | 4.41 [2.83-5.95]                 | 3.80 [3.50-5.82]                       | 5.97 [4.34-6.87]        | 0.012                         | NS                            | NS (0.077)                       | NS                                        |

Values are the median [IQR]. Percentages of each population in total CD4<sup>+</sup> T cells are shown.

*p* values (K-W test) were obtained by Kruskal-Wallis analyses, and if they were statistically significant, then *p*<sup>adj</sup> values were calculated using multivariate linear regression analyses adjusted for age and sex.

HCs = healthy controls; IFN- $\beta$  = interferon- $\beta$ ; IQR = interquartile ranges; K-W = Kruskal-Wallis; MS = multiple sclerosis; NS = not significant; Tcm = central memory T cells; Teff = effector T cells; Tem = effector memory T cells; Tnaive = naïve T cells; Treg = regulatory T cells; w/ = with.

**Table S5** Comparison of the percentages of CD8<sup>+</sup> T cell subsets between the untreated MS group, IFN- $\beta$ -treated MS group and healthy controls

| In total CD8 <sup>+</sup> T cells               | Untreated MS<br>( <i>n</i> = 35) | MS w/ IFN- $\beta$<br>( <i>n</i> = 21) | HCs<br>( <i>n</i> = 44) | <i>p</i> value (K-<br>W test) | <i>p</i> <sup>adj</sup> value |                                  |                                           |
|-------------------------------------------------|----------------------------------|----------------------------------------|-------------------------|-------------------------------|-------------------------------|----------------------------------|-------------------------------------------|
|                                                 |                                  |                                        |                         |                               | Untreated MS<br>vs.<br>HCs    | MS w/ IFN- $\beta$<br>vs.<br>HCs | Untreated MS<br>vs.<br>MS w/ IFN- $\beta$ |
| Tnaive (CCR7 <sup>+</sup> CD45RA <sup>+</sup> ) | 28.1 [17.7-53.8]                 | 46.0 [28.6-64.3]                       | 44.4 [33.6-54.2]        | 0.035                         | NS                            | NS                               | 0.031                                     |
| Tcm (CCR7 <sup>+</sup> CD45RA <sup>-</sup> )    | 5.14 [3.04-9.04]                 | 8.68 [5.51-12.0]                       | 5.55 [3.72-7.58]        | 0.017                         | NS                            | NS                               | 0.013                                     |
| Tem (CCR7 <sup>-</sup> CD45RA <sup>-</sup> )    | 37.6 [26.7-46.6]                 | 26.7 [16.9-45.3]                       | 29.2 [23.9-44.0]        | NS                            | –                             | –                                | –                                         |
| Teff (CCR7 <sup>-</sup> CD45RA <sup>+</sup> )   | 15.9 [8.70-25.2]                 | 11.6 [6.68-17.4]                       | 12.8 [8.16-22.8]        | NS                            | –                             | –                                | –                                         |
| Activated T (HLA-DR <sup>+</sup> )              | 4.27 [2.72-6.83]                 | 4.55 [2.79-6.58]                       | 3.63 [2.07-6.17]        | NS                            | –                             | –                                | –                                         |

Values are the median [IQR]. Percentages of each population in total CD8<sup>+</sup> T cells are shown.

*p* values (K-W test) were obtained by Kruskal-Wallis analyses, and if they were statistically significant, then *p*<sup>adj</sup> values were calculated using multivariate linear regression analyses adjusted for age and sex.

HCs = healthy controls; IFN- $\beta$  = interferon- $\beta$ ; IQR = interquartile ranges; K-W = Kruskal-Wallis; MS = multiple sclerosis; NS = not significant; Tcm = central memory T cells; Teff = effector T cells; Tem = effector memory T cells; Tnaive = naïve T cells; w/ = with.

**Table S6** Comparison of the percentages of cytokine-producing  $\alpha\beta$  T cell subsets between the untreated MS group, IFN- $\beta$ -treated MS group and healthy controls

|                                                | Untreated MS<br>(n = 35) | MS w/ IFN- $\beta$<br>(n = 21) | HCs<br>(n = 44)  | p value<br>(K-W test) | <i>p</i> <sup>adj</sup> value |                                  |                                           |
|------------------------------------------------|--------------------------|--------------------------------|------------------|-----------------------|-------------------------------|----------------------------------|-------------------------------------------|
|                                                |                          |                                |                  |                       | Untreated MS<br>vs.<br>HCs    | MS w/ IFN- $\beta$<br>vs.<br>HCs | Untreated MS<br>vs.<br>MS w/ IFN- $\beta$ |
| <b>In CD4<sup>+</sup> T cells</b>              |                          |                                |                  |                       |                               |                                  |                                           |
| IL-17A <sup>+</sup>                            | 0.24 [0.16-0.58]         | 0.37 [0.27-0.61]               | 0.55 [0.25-1.11] | 0.004                 | 0.017                         | NS                               | NS                                        |
| IFN- $\gamma$ <sup>+</sup>                     | 5.77 [2.04-8.24]         | 6.70 [2.38-10.3]               | 9.42 [4.59-14.6] | NS (0.052)            | –                             | –                                | –                                         |
| IL-4 <sup>+</sup>                              | 1.70 [0.83-2.91]         | 1.64 [1.04-2.69]               | 2.76 [1.67-4.31] | 0.018                 | 0.011                         | NS                               | NS                                        |
| GM-CSF <sup>+</sup>                            | 1.36 [0.76-3.19]         | 1.90 [1.56-3.71]               | 5.40 [1.19-7.91] | 0.002                 | 0.002                         | 0.034                            | NS                                        |
| IL-17A <sup>+</sup> IFN- $\gamma$ <sup>+</sup> | 0.03 [0.01-0.08]         | 0.04 [0.02-0.08]               | 0.06 [0.02-0.14] | 0.039                 | NS (0.093)                    | NS                               | NS                                        |
| IL-17A <sup>+</sup> GM-CSF <sup>+</sup>        | 0.04 [0.01-0.08]         | 0.05 [0.03-0.11]               | 0.15 [0.07-0.32] | <0.001                | 0.010                         | NS (0.081)                       | NS                                        |
| <b>In CD8<sup>+</sup> T cells</b>              |                          |                                |                  |                       |                               |                                  |                                           |
| IL-17A <sup>+</sup>                            | 0.17 [0.08-0.28]         | 0.24 [0.14-0.39]               | 0.16 [0.10-0.31] | NS                    | –                             | –                                | –                                         |
| IFN- $\gamma$ <sup>+</sup>                     | 18.7 [10.1-37.6]         | 15.6 [4.97-33.0]               | 27.2 [16.1-38.3] | NS                    | –                             | –                                | –                                         |
| IL-17A <sup>+</sup> IFN- $\gamma$ <sup>+</sup> | 0.05 [0.02-0.10]         | 0.06 [0.02-0.07]               | 0.07 [0.02-0.14] | NS                    | –                             | –                                | –                                         |

Values are the median [IQR]. Percentages of each population are shown.

*p* values (K-W test) were obtained by Kruskal-Wallis analyses, and if they were statistically significant, then *p*<sup>adj</sup> values were calculated using multivariate linear regression analyses adjusted for age and sex.

GM-CSF = granulocyte macrophage colony-stimulating factor; HCs = healthy controls; IFN = interferon; IL = interleukin; IQR = interquartile ranges; K-W = Kruskal-Wallis; MS = multiple sclerosis; NS = not significant; w/ = with.

**Table S7** Comparison of the percentages of cytokine-producing  $\gamma\delta$  T cell subsets in IFN- $\beta$ -treated MS patients stratified to the NEDA or EDA groups

|                                                                                                               | MS w/IFN- $\beta$       |                         |                         | <i>p</i> value<br>(K-W test) | <i>p</i> <sup>adj</sup> value |                   |                    |
|---------------------------------------------------------------------------------------------------------------|-------------------------|-------------------------|-------------------------|------------------------------|-------------------------------|-------------------|--------------------|
|                                                                                                               | NEDA<br>( <i>n</i> = 8) | EDA<br>( <i>n</i> = 13) | HCs<br>( <i>n</i> = 44) |                              | NEDA<br>vs.<br>HCs            | EDA<br>vs.<br>HCs | NEDA<br>vs.<br>EDA |
| <b>In V<math>\delta</math>1<sup>+</sup> <math>\gamma\delta</math>T cells</b>                                  |                         |                         |                         |                              |                               |                   |                    |
| IL-17A <sup>+</sup>                                                                                           | 0.58 [0.10-1.04]        | 0.27 [0.00-1.20]        | 0.18 [0.01-0.72]        | NS                           | –                             | –                 | –                  |
| IFN- $\gamma$ <sup>+</sup>                                                                                    | 35.2 [17.7-56.9]        | 25.0 [5.75-34.3]        | 45.8 [24.4-60.8]        | 0.015                        | NS                            | 0.001             | NS (0.070)         |
| IL-17A <sup>+</sup> IFN- $\gamma$ <sup>+</sup>                                                                | 0.21 [0.04-0.75]        | 0.11 [0.00-0.55]        | 0.08 [0.00-0.31]        | NS                           | –                             | –                 | –                  |
| IL-17A <sup>-</sup> IFN- $\gamma$ <sup>-</sup>                                                                | 64.8 [42.9-82.0]        | 75.0 [65.3-93.2]        | 54.1 [39.1-75.5]        | 0.014                        | NS                            | 0.001             | NS (0.074)         |
| <b>In V<math>\delta</math>2<sup>+</sup> <math>\gamma\delta</math>T cells</b>                                  |                         |                         |                         |                              |                               |                   |                    |
| IL-17A <sup>+</sup>                                                                                           | 0.00 [0.00-2.10]        | 0.00 [0.00-0.82]        | 0.13 [0.01-0.52]        | NS                           | –                             | –                 | –                  |
| IFN- $\gamma$ <sup>+</sup>                                                                                    | 39.9 [23.1-74.7]        | 32.4 [18.8-58.7]        | 83.6 [69.1-92.7]        | <0.001                       | 0.003                         | <0.001            | NS                 |
| IL-17A <sup>+</sup> IFN- $\gamma$ <sup>+</sup>                                                                | 0.00 [0.00-1.56]        | 0.00 [0.00-0.18]        | 0.11 [0.01-0.42]        | NS                           | –                             | –                 | –                  |
| IL-17A <sup>-</sup> IFN- $\gamma$ <sup>-</sup>                                                                | 60.1 [25.0-76.9]        | 67.6 [40.8-78.9]        | 16.0 [7.30-30.9]        | <0.001                       | 0.003                         | <0.001            | NS                 |
| <b>In V<math>\delta</math>1<sup>-</sup>V<math>\delta</math>2<sup>-</sup> <math>\gamma\delta</math>T cells</b> |                         |                         |                         |                              |                               |                   |                    |
| IL-17A <sup>+</sup>                                                                                           | 1.03 [0.39-2.13]        | 0.79 [0.31-1.87]        | 1.24 [0.66-2.81]        | NS                           | –                             | –                 | –                  |
| IFN- $\gamma$ <sup>+</sup>                                                                                    | 31.1 [14.6-52.8]        | 14.2 [8.88-27.3]        | 47.1 [32.5-58.2]        | <0.001                       | NS                            | <0.001            | 0.033              |
| IL-17A <sup>+</sup> IFN- $\gamma$ <sup>+</sup>                                                                | 0.44 [0.19-0.80]        | 0.34 [0.00-0.65]        | 0.35 [0.19-1.22]        | NS                           | –                             | –                 | –                  |
| IL-17A <sup>-</sup> IFN- $\gamma$ <sup>-</sup>                                                                | 68.6 [46.4-84.7]        | 84.0 [72.2-88.6]        | 51.7 [41.3-66.9]        | <0.001                       | NS                            | <0.001            | 0.038              |

Values are the median [IQR]. Percentages of each population are shown.



$p$  values (K-W test) were obtained by Kruskal-Wallis analyses, and if they were statistically significant, then  $p^{adj}$  values were calculated using multivariate linear regression analyses adjusted for age and sex.

EDA = evidence of disease activity; HCs = healthy controls; IFN = interferon; IL = interleukin; IQR = interquartile ranges; K-W = Kruskal-Wallis; MS = multiple sclerosis; NEDA = no-evidence of disease activity; NS = not significant; w/ = with.

**Table S8** Comparison of the percentages of  $\gamma\delta$  T cell subsets in untreated MS patients stratified to the NEDA or EDA groups

|                                                                               | Untreated MS             |                         |                         | <i>p</i> value (K-W test) | <i>p</i> <sup>adj</sup> value |                   |                    |
|-------------------------------------------------------------------------------|--------------------------|-------------------------|-------------------------|---------------------------|-------------------------------|-------------------|--------------------|
|                                                                               | NEDA<br>( <i>n</i> = 19) | EDA<br>( <i>n</i> = 13) | HCs<br>( <i>n</i> = 44) |                           | NEDA<br>vs.<br>HCs            | EDA<br>vs.<br>HCs | NEDA<br>vs.<br>EDA |
| V $\delta$ 1 <sup>+</sup>                                                     | 29.0 [14.0-71.5]         | 31.9 [17.5-51.8]        | 18.4 [11.6-34.2]        | NS                        | –                             | –                 | –                  |
| V $\delta$ 1 <sup>+</sup> V $\gamma$ 9 <sup>+</sup>                           | 4.00 [1.63-16.3]         | 3.91 [1.14-8.07]        | 2.15 [1.12-4.71]        | NS                        | –                             | –                 | –                  |
| V $\delta$ 1 <sup>+</sup> V $\gamma$ 9 <sup>-</sup>                           | 23.1 [10.2-42.3]         | 30.4 [15.0-41.4]        | 15.5 [8.47-31.5]        | NS                        | –                             | –                 | –                  |
| V $\delta$ 2 <sup>+</sup>                                                     | 38.5 [5.30-56.2]         | 29.9 [15.6-51.7]        | 54.9 [31.7-65.9]        | 0.024                     | NS                            | NS (0.076)        | NS                 |
| V $\delta$ 2 <sup>+</sup> V $\gamma$ 9 <sup>+</sup>                           | 37.9 [5.16-55.9]         | 29.8 [14.5-51.0]        | 54.3 [31.1-65.7]        | 0.021                     | NS                            | NS (0.073)        | NS                 |
| V $\delta$ 2 <sup>+</sup> V $\gamma$ 9 <sup>-</sup>                           | 0.19 [0.11-0.46]         | 0.14 [0.03-0.67]        | 0.08 [0.03-0.29]        | NS                        | –                             | –                 | –                  |
| V $\delta$ 1 <sup>-</sup> V $\delta$ 2 <sup>-</sup>                           | 21.1 [14.1-27.3]         | 28.2 [17.3-43.0]        | 22.8 [17.1-30.3]        | NS                        | –                             | –                 | –                  |
| V $\delta$ 1 <sup>-</sup> V $\delta$ 2 <sup>-</sup> V $\gamma$ 9 <sup>+</sup> | 1.61 [0.30-2.69]         | 1.10 [0.46-3.15]        | 2.42 [1.25-3.83]        | NS (0.069)                | –                             | –                 | –                  |
| V $\delta$ 1 <sup>-</sup> V $\delta$ 2 <sup>-</sup> V $\gamma$ 9 <sup>-</sup> | 20.0 [11.0-25.7]         | 27.5 [17.2-36.9]        | 18.1 [10.7-26.4]        | NS (0.065)                | –                             | –                 | –                  |

Values are the median [IQR]. Percentages of each population in total  $\gamma\delta$  T cells are shown.

*p* values (K-W test) were obtained by Kruskal-Wallis analyses, and if they were statistically significant, then *p*<sup>adj</sup> values were calculated using multivariate linear regression analyses adjusted for age and sex.

EDA = evidence of disease activity; HCs = healthy controls; IFN- $\beta$  = interferon- $\beta$ ; IQR = interquartile ranges; K-W = Kruskal-Wallis; MS = multiple sclerosis; NEDA = no-evidence of disease activity; NS = not significant.

**Table S9** Comparison of the percentages of B cell subsets in untreated MS patients stratified to the NEDA or EDA groups

|                                                              | Untreated MS             |                         |                         | <i>p</i> value (K-W test) | <i>p</i> <sup>adj</sup> value |                   |                    |
|--------------------------------------------------------------|--------------------------|-------------------------|-------------------------|---------------------------|-------------------------------|-------------------|--------------------|
|                                                              | NEDA<br>( <i>n</i> = 19) | EDA<br>( <i>n</i> = 13) | HCs<br>( <i>n</i> = 44) |                           | NEDA<br>vs.<br>HCs            | EDA<br>vs.<br>HCs | NEDA<br>vs.<br>EDA |
| Naïve (CD27 <sup>-</sup> IgD <sup>+</sup> )                  | 46.3 [27.1-54.0]         | 53.8 [38.8-59.5]        | 51.8 [41.4-60.6]        | NS                        | –                             | –                 | –                  |
| Memory (CD27 <sup>+</sup> )                                  | 13.4 [9.82-24.4]         | 19.9 [12.6-36.2]        | 22.7 [16.9-29.9]        | 0.024                     | NS                            | NS                | NS                 |
| CS <sup>+</sup> Memory (CD27 <sup>+</sup> IgD <sup>-</sup> ) | 11.2 [8.84-22.0]         | 18.0 [11.1-32.7]        | 18.8 [14.4-25.2]        | NS (0.060)                | –                             | –                 | –                  |
| CS <sup>-</sup> Memory (CD27 <sup>+</sup> IgD <sup>+</sup> ) | 1.65 [0.72-2.68]         | 2.28 [1.86-3.80]        | 3.49 [2.49-4.67]        | <0.001                    | 0.043                         | NS                | NS                 |
| Plasmablasts (CD38 <sup>high</sup> CD20 <sup>-</sup> )       | 0.25 [0.12-0.49]         | 0.61 [0.28-1.48]        | 0.37 [0.24-0.67]        | 0.030                     | NS                            | NS (0.064)        | 0.008              |
| Transitional (CD24 <sup>high</sup> CD38 <sup>high</sup> )    | 3.16 [1.80-4.14]         | 2.50 [0.58-6.09]        | 3.14 [2.32-4.45]        | NS                        | –                             | –                 | –                  |

Values are the median [IQR]. Percentages of each population in total B cells are shown.

*p* values (K-W test) were obtained by Kruskal-Wallis analyses, and if they were statistically significant, then *p*<sup>adj</sup> values were calculated using multivariate linear regression analyses adjusted for age and sex.

CS<sup>+</sup> = class-switched; CS<sup>-</sup> = non-class-switched; EDA = evidence of disease activity; HCs = healthy controls; IFN-β = interferon-β; IQR = interquartile ranges; K-W = Kruskal-Wallis; MS = multiple sclerosis; NEDA = no-evidence of disease activity; NS = not significant.

**Table S10** Comparison of the percentages of  $\gamma\delta$  T cell subsets between RRMS and PMS patients

|                                                                               | Untreated MS             |                        |                | MS w/IFN- $\beta$        |                        |                |
|-------------------------------------------------------------------------------|--------------------------|------------------------|----------------|--------------------------|------------------------|----------------|
|                                                                               | RRMS<br>( <i>n</i> = 26) | PMS<br>( <i>n</i> = 9) | <i>p</i> value | RRMS<br>( <i>n</i> = 13) | PMS<br>( <i>n</i> = 8) | <i>p</i> value |
| V $\delta$ 1 <sup>+</sup>                                                     | 27.0 [13.3-47.4]         | 49.7 [16.8-77.2]       | NS             | 29.6 [14.9-52.0]         | 24.5 [12.7-43.6]       | NS             |
| V $\delta$ 1 <sup>+</sup> V $\gamma$ 9 <sup>+</sup>                           | 3.26 [0.93-5.31]         | 11.1 [2.64-20.9]       | NS (0.062)     | 3.22 [1.88-6.70]         | 2.68 [1.52-3.90]       | NS             |
| V $\delta$ 1 <sup>+</sup> V $\gamma$ 9 <sup>-</sup>                           | 22.5 [9.64-38.0]         | 36.7 [10.6-51.2]       | NS             | 23.5 [9.18-42.7]         | 21.9 [11.4-35.3]       | NS             |
| V $\delta$ 2 <sup>+</sup>                                                     | 37.0 [18.6-54.8]         | 7.34 [2.11-54.3]       | NS             | 11.0 [3.75-24.2]         | 33.4 [11.2-44.5]       | NS (0.076)     |
| V $\delta$ 2 <sup>+</sup> V $\gamma$ 9 <sup>+</sup>                           | 36.0 [18.0-54.6]         | 7.34 [1.87-54.0]       | NS             | 10.6 [3.55-23.8]         | 32.2 [11.1-44.4]       | NS (0.089)     |
| V $\delta$ 2 <sup>+</sup> V $\gamma$ 9 <sup>-</sup>                           | 0.20 [0.11-0.51]         | 0.06 [0.00-0.27]       | NS             | 0.21 [0.11-0.72]         | 0.06 [0.00-0.20]       | NS (0.099)     |
| V $\delta$ 1 <sup>-</sup> V $\delta$ 2 <sup>-</sup>                           | 26.2 [16.4-42.9]         | 22.7 [14.5-38.7]       | NS             | 43.6 [22.8-63.4]         | 32.3 [27.7-43.2]       | NS             |
| V $\delta$ 1 <sup>-</sup> V $\delta$ 2 <sup>-</sup> V $\gamma$ 9 <sup>+</sup> | 1.89 [0.38-3.57]         | 0.66 [0.10-1.31]       | 0.050          | 2.22 [0.33-2.82]         | 0.88 [0.25-1.48]       | NS             |
| V $\delta$ 1 <sup>-</sup> V $\delta$ 2 <sup>-</sup> V $\gamma$ 9 <sup>-</sup> | 23.8 [15.4-34.8]         | 21.3 [13.8-37.0]       | NS             | 41.4 [19.5-60.1]         | 31.7 [25.4-42.5]       | NS             |

Values are the median [IQR]. Percentages of each population in total  $\gamma\delta$  T cells are shown.

IFN- $\beta$  = interferon- $\beta$ ; IQR = interquartile ranges; MS = multiple sclerosis; NS = not significant; PMS = progressive MS; RRMS = relapsing-remitting MS; w/ = with.

**Table S11** Comparison of the percentages of CD4<sup>+</sup> T cell subsets between RRMS and PMS patients

| In total CD4 <sup>+</sup> T cells                | Untreated MS             |                        |                | MS w/IFN- $\beta$        |                        |                |
|--------------------------------------------------|--------------------------|------------------------|----------------|--------------------------|------------------------|----------------|
|                                                  | RRMS<br>( <i>n</i> = 26) | PMS<br>( <i>n</i> = 9) | <i>p</i> value | RRMS<br>( <i>n</i> = 13) | PMS<br>( <i>n</i> = 8) | <i>p</i> value |
| Tnaive (CCR7 <sup>+</sup> CD45RA <sup>+</sup> )  | 55.8 [43.4-66.2]         | 38.8 [32.9-41.8]       | 0.002          | 51.9 [44.4-57.1]         | 44.6 [33.2-60.6]       | NS             |
| Tcm (CCR7 <sup>+</sup> CD45RA <sup>-</sup> )     | 25.3 [21.2-33.5]         | 30.4 [28.0-38.0]       | NS             | 26.7 [19.4-34.1]         | 27.5 [21.7-31.6]       | NS             |
| Tem (CCR7 <sup>-</sup> CD45RA <sup>-</sup> )     | 17.6 [12.1-22.1]         | 26.4 [20.8-35.0]       | 0.004          | 16.4 [14.7-19.0]         | 22.8 [10.7-34.7]       | NS             |
| Teff (CCR7 <sup>-</sup> CD45RA <sup>+</sup> )    | 2.75 [1.73-3.52]         | 2.85 [1.77-7.60]       | NS             | 2.87 [2.19-5.39]         | 2.76 [2.15-3.03]       | NS             |
| Activated T (HLA-DR <sup>+</sup> )               | 1.86 [1.31-2.86]         | 2.55 [1.84-4.01]       | NS (0.070)     | 2.36 [1.83-2.91]         | 2.05 [1.06-4.73]       | NS             |
| Treg (CD25 <sup>+</sup> CD127 <sup>low/-</sup> ) | 4.16 [2.39-5.85]         | 5.21 [4.05-6.12]       | NS             | 3.83 [3.57-5.82]         | 3.66 [2.30-6.13]       | NS             |

Values are the median [IQR]. Percentages of each population in total CD4<sup>+</sup> T cells are shown.

IFN- $\beta$  = interferon- $\beta$ ; IQR = interquartile ranges; MS = multiple sclerosis; NS = not significant; PMS = progressive MS; RRMS = relapsing-remitting MS; Tcm = central memory T cells; Teff = effector T cells; Tem = effector memory T cells; Tnaive = naïve T cells; Treg = regulatory T cells; w/ = with.

**Table S12** Comparison of the percentages of CD8<sup>+</sup> T cell subsets between RRMS and PMS patients

| In total CD8 <sup>+</sup> T cells               | Untreated MS             |                        |                | MS w/IFN- $\beta$        |                        |                |
|-------------------------------------------------|--------------------------|------------------------|----------------|--------------------------|------------------------|----------------|
|                                                 | RRMS<br>( <i>n</i> = 26) | PMS<br>( <i>n</i> = 9) | <i>p</i> value | RRMS<br>( <i>n</i> = 13) | PMS<br>( <i>n</i> = 8) | <i>p</i> value |
| Tnaive (CCR7 <sup>+</sup> CD45RA <sup>+</sup> ) | 31.7 [19.6-58.2]         | 21.9 [6.77-28.7]       | NS (0.052)     | 52.1 [43.0-64.3]         | 28.6 [16.4-70.9]       | NS             |
| Tcm (CCR7 <sup>+</sup> CD45RA <sup>-</sup> )    | 5.22 [3.03-7.81]         | 3.45 [2.28-9.97]       | NS             | 9.97 [7.87-13.1]         | 6.15 [3.41-11.0]       | NS (0.076)     |
| Tem (CCR7 <sup>-</sup> CD45RA <sup>-</sup> )    | 36.4 [25.0-46.0]         | 43.5 [34.8-55.6]       | NS             | 21.1 [16.9-30.6]         | 45.3 [14.5-64.8]       | NS             |
| Teff (CCR7 <sup>-</sup> CD45RA <sup>+</sup> )   | 15.9 [7.62-26.5]         | 19.4 [12.0-41.1]       | NS             | 11.6 [6.18-17.4]         | 12.7 [7.29-23.0]       | NS             |
| Activated T (HLA-DR <sup>+</sup> )              | 4.11 [2.71-7.25]         | 4.27 [2.85-6.43]       | NS             | 4.77 [4.12-6.58]         | 3.07 [1.67-6.43]       | NS             |

Values are the median [IQR]. Percentages of each population in total CD8<sup>+</sup> T cells are shown.

IFN- $\beta$  = interferon- $\beta$ ; IQR = interquartile ranges; MS = multiple sclerosis; NS = not significant; PMS = progressive MS; RRMS = relapsing-remitting MS; Tcm = central memory T cells; Teff = effector T cells; Tem = effector memory T cells; Tnaive = naïve T cells; Treg = regulatory T cells; w/ = with.

**Table S13** Comparison of the percentages of B cell subsets between RRMS and PMS patients

|                                                              | Untreated MS             |                        |                | MS w/IFN- $\beta$        |                        |                |
|--------------------------------------------------------------|--------------------------|------------------------|----------------|--------------------------|------------------------|----------------|
|                                                              | RRMS<br>( <i>n</i> = 26) | PMS<br>( <i>n</i> = 9) | <i>p</i> value | RRMS<br>( <i>n</i> = 13) | PMS<br>( <i>n</i> = 8) | <i>p</i> value |
| Naïve (CD27 <sup>-</sup> IgD <sup>+</sup> )                  | 45.5 [27.7-56.3]         | 52.0 [29.6-60.7]       | NS             | 55.6 [50.3-63.2]         | 35.1 [18.0-40.9]       | <0.001         |
| Memory (CD27 <sup>+</sup> )                                  | 17.3 [11.4-29.2]         | 11.3 [8.47-19.8]       | NS             | 8.81 [6.12-12.5]         | 14.0 [8.42-23.8]       | NS (0.065)     |
| CS <sup>+</sup> memory (CD27 <sup>+</sup> IgD <sup>-</sup> ) | 15.3 [10.2-25.6]         | 10.7 [7.72-18.1]       | NS             | 6.93 [5.31-11.3]         | 13.2 [7.48-20.9]       | NS (0.060)     |
| CS <sup>-</sup> memory (CD27 <sup>+</sup> IgD <sup>+</sup> ) | 2.27 [0.98-2.78]         | 1.65 [0.57-2.50]       | NS             | 1.13 [0.89-1.67]         | 0.92 [0.64-2.86]       | NS             |
| Plasmablasts (CD38 <sup>high</sup> CD20 <sup>-</sup> )       | 0.28 [0.11-0.59]         | 0.49 [0.16-1.65]       | NS             | 0.36 [0.21-0.47]         | 0.31 [0.28-1.14]       | NS             |
| Transitional (CD24 <sup>high</sup> CD38 <sup>high</sup> )    | 2.83 [1.88-6.00]         | 3.20 [0.48-7.00]       | NS             | 6.36 [4.16-10.5]         | 1.52 [1.05-5.14]       | 0.015          |

Values are the median [IQR]. Percentages of each population in total B cells are shown.

CS<sup>+</sup> = class-switched; CS<sup>-</sup> = non-class-switched; IFN- $\beta$  = interferon- $\beta$ ; IQR = interquartile ranges; MS = multiple sclerosis; NS = not significant; PMS = progressive MS; RRMS = relapsing-remitting MS; w/ = with.

**Table S14** Comparison of the percentages of cytokine-producing  $\gamma\delta$  T cell subsets between RRMS and PMS patients

|                                                                                                               | Untreated MS             |                        |                | MS w/IFN- $\beta$        |                        |                |
|---------------------------------------------------------------------------------------------------------------|--------------------------|------------------------|----------------|--------------------------|------------------------|----------------|
|                                                                                                               | RRMS<br>( <i>n</i> = 26) | PMS<br>( <i>n</i> = 9) | <i>p</i> value | RRMS<br>( <i>n</i> = 13) | PMS<br>( <i>n</i> = 8) | <i>p</i> value |
| <b>In V<math>\delta</math>1<sup>+</sup><math>\gamma\delta</math> T cells</b>                                  |                          |                        |                |                          |                        |                |
| IL-17A <sup>+</sup>                                                                                           | 0.13 [0.00-0.41]         | 0.12 [0.00-0.50]       | NS             | 0.54 [0.02-1.03]         | 0.33 [0.04-1.16]       | NS             |
| IFN- $\gamma$ <sup>+</sup>                                                                                    | 35.9 [16.5-40.8]         | 36.6 [12.4-54.9]       | NS             | 25.0 [7.14-45.2]         | 32.7 [11.9-37.9]       | NS             |
| IL-17A <sup>+</sup> IFN- $\gamma$ <sup>+</sup>                                                                | 0.03 [0.00-0.14]         | 0.00 [0.00-0.12]       | NS             | 0.17 [0.00-0.66]         | 0.18 [0.00-0.58]       | NS             |
| IL-17A <sup>-</sup> IFN- $\gamma$ <sup>-</sup>                                                                | 64.1 [58.5-81.8]         | 63.4 [45.0-87.4]       | NS             | 75.0 [54.8-91.9]         | 66.8 [62.1-87.7]       | NS             |
| <b>In V<math>\delta</math>2<sup>+</sup><math>\gamma\delta</math> T cells</b>                                  |                          |                        |                |                          |                        |                |
| IL-17A <sup>+</sup>                                                                                           | 0.07 [0.00-0.45]         | 0.00 [0.00-0.47]       | NS             | 0.00 [0.00-2.63]         | 0.00 [0.00-1.15]       | NS             |
| IFN- $\gamma$ <sup>+</sup>                                                                                    | 51.5 [12.7-85.1]         | 37.5 [6.33-62.4]       | NS             | 38.1 [24.6-56.3]         | 49.2 [11.4-71.9]       | NS             |
| IL-17A <sup>+</sup> IFN- $\gamma$ <sup>+</sup>                                                                | 0.00 [0.00-0.29]         | 0.00 [0.00-0.06]       | NS             | 0.00 [0.00-1.06]         | 0.00 [0.00-0.47]       | NS             |
| IL-17A <sup>-</sup> IFN- $\gamma$ <sup>-</sup>                                                                | 48.5 [14.9-87.3]         | 62.5 [36.8-93.2]       | NS             | 61.9 [43.4-75.4]         | 50.4 [27.2-88.5]       | NS             |
| <b>In V<math>\delta</math>1<sup>-</sup>V<math>\delta</math>2<sup>-</sup><math>\gamma\delta</math> T cells</b> |                          |                        |                |                          |                        |                |
| IL-17A <sup>+</sup>                                                                                           | 0.63 [0.27-1.38]         | 0.53 [0.25-1.43]       | NS             | 0.73 [0.40-1.72]         | 1.22 [0.20-1.93]       | NS             |
| IFN- $\gamma$ <sup>+</sup>                                                                                    | 29.3 [14.0-40.7]         | 23.9 [6.52-41.7]       | NS             | 15.8 [11.6-42.4]         | 24.8 [7.81-31.7]       | NS             |
| IL-17A <sup>+</sup> IFN- $\gamma$ <sup>+</sup>                                                                | 0.23 [0.03-0.53]         | 0.17 [0.00-0.51]       | NS             | 0.34 [0.18-0.48]         | 0.65 [0.00-0.92]       | NS             |
| IL-17A <sup>-</sup> IFN- $\gamma$ <sup>-</sup>                                                                | 70.6 [58.9-85.6]         | 75.8 [57.9-93.5]       | NS             | 83.9 [56.7-87.8]         | 75.1 [67.3-91.9]       | NS             |

Values are the median [IQR]. Percentages of each population are shown.



IFN = interferon; IL = interleukin; IQR = interquartile ranges; MS = multiple sclerosis; NS = not significant; PMS = progressive MS; RRMS = relapsing-remitting MS; w/ = with.

**Table S15** Comparison of the percentages of cytokine-producing  $\alpha\beta$  T cell subsets between RRMS and PMS patients

|                                                | Untreated MS             |                        |                | MS w/IFN- $\beta$        |                        |                |
|------------------------------------------------|--------------------------|------------------------|----------------|--------------------------|------------------------|----------------|
|                                                | RRMS<br>( <i>n</i> = 26) | PMS<br>( <i>n</i> = 9) | <i>p</i> value | RRMS<br>( <i>n</i> = 13) | PMS<br>( <i>n</i> = 8) | <i>p</i> value |
| <b>In CD4<sup>+</sup> T cells</b>              |                          |                        |                |                          |                        |                |
| IL-17A <sup>+</sup>                            | 0.24 [0.15-0.61]         | 0.29 [0.11-0.47]       | NS             | 0.39 [0.27-0.57]         | 0.33 [0.27-0.62]       | NS             |
| IFN- $\gamma$ <sup>+</sup>                     | 4.42 [2.01-7.32]         | 8.20 [3.19-9.98]       | NS             | 6.70 [2.38-8.74]         | 8.22 [2.57-16.0]       | NS             |
| IL-4 <sup>+</sup>                              | 1.48 [0.80-2.81]         | 2.46 [1.06-3.85]       | NS             | 1.64 [1.04-2.44]         | 2.12 [1.06-3.55]       | NS             |
| GM-CSF <sup>+</sup>                            | 1.47 [0.76-3.22]         | 1.36 [0.48-4.01]       | NS             | 2.59 [1.78-4.12]         | 1.68 [1.28-2.13]       | NS             |
| IL-17A <sup>+</sup> IFN- $\gamma$ <sup>+</sup> | 0.03 [0.01-0.06]         | 0.03 [0.01-0.05]       | NS             | 0.04 [0.02-0.09]         | 0.04 [0.02-0.08]       | NS             |
| IL-17A <sup>+</sup> GM-CSF <sup>+</sup>        | 0.04 [0.01-0.10]         | 0.04 [0.01-0.05]       | NS             | 0.08 [0.03-0.15]         | 0.04 [0.02-0.05]       | NS (0.089)     |
| <b>In CD8<sup>+</sup> T cells</b>              |                          |                        |                |                          |                        |                |
| IL-17A <sup>+</sup>                            | 0.19 [0.10-0.37]         | 0.13 [0.06-0.17]       | NS             | 0.25 [0.16-0.63]         | 0.18 [0.13-0.25]       | NS             |
| IFN- $\gamma$ <sup>+</sup>                     | 16.8 [9.97-29.1]         | 37.6 [8.73-50.7]       | NS             | 15.3 [4.97-20.9]         | 33.0 [7.12-41.5]       | NS             |
| IL-17A <sup>+</sup> IFN- $\gamma$ <sup>+</sup> | 0.05 [0.02-0.12]         | 0.04 [0.01-0.08]       | NS             | 0.06 [0.02-0.13]         | 0.04 [0.03-0.06]       | NS             |

Values are the median [IQR]. Percentages of each population are shown.

GM-CSF = granulocyte macrophage colony-stimulating factor; IFN = interferon; IL = interleukin; IQR = interquartile ranges; MS = multiple sclerosis; NS = not significant; PMS = progressive MS; RRMS = relapsing-remitting MS; w/ = with.
